# Supplementary material
Source: PubMed Central journal article supplement (PMC2765165)
Supplement: 0907095106_ST1_PDF.pdf [file 0907095106_ST1_PDF.pdf]

**Table S1.** List of phospho- and nonphospho-peptides identified from immunoprecipitated SRK2E-GFP or SRK2I-GFP.

Immunoprecipitates were prepared as described in Methods, and analyzed with a nanoLC-MS/MS system. Data was analyzed and manually checked as described in Supplementary Methods, and peptides annotated as SRK2E (At4g33950) or SRK2I (At5g66880) were listed. Precursor-origin neutral loss peaks were assigned when they were one of the most intense 10 peaks in each spectrum with the m/z tolerance of 0.8Da. Phospho-peptides were marked by pink. The final evaluation of the phosphorylated site localization was performed based on PTM probability scores.

| Peptide number | Peptide sequence        | Modification site by Mascot                          | AGI code                                                                                                                                                    | Mascot peptide score | Observed m/z | Charge | Observed mass(Da) | Mass error(Da) | Retention time (min) | Forward residue | Backward residue | Precursor origin neutral loss peak | Phospho-site by manual confirmation | Manually-confirmed phospho-site | Ambiguous phospho-site by manual inspection | Phosphorylated positions | Phosphosite evaluation based on PTM localization probability* |
|----------------|-------------------------|------------------------------------------------------|-------------------------------------------------------------------------------------------------------------------------------------------------------------|----------------------|--------------|--------|-------------------|----------------|----------------------|-----------------|------------------|------------------------------------|-------------------------------------|---------------------------------|---------------------------------------------|--------------------------|---------------------------------------------------------------|
| 1              | APVTTGPLDMPIMHSDRYDFVK  |                                                      | AT5G66880.1                                                                                                                                                 | 59                   | 652.0663     | 4      | 2604.236094       | 0.0009         | 48.767               | R               | D                |                                    |                                     |                                 |                                             |                          |                                                               |
| 2              | APVTTGPLDMPIMHSDRYDFVK  | Oxidation@M:10                                       | AT5G66880.1                                                                                                                                                 | 65                   | 656.0649     | 4      | 2620.230494       | 0.0004         | 42.659               | R               | D                |                                    |                                     |                                 |                                             |                          |                                                               |
| 3              | APVTTGPLDMPIMHSDRYDFVK  | Oxidation@M:10,Oxidation@M:13                        | AT5G66880.1                                                                                                                                                 | 53                   | 660.0644     | 4      | 2636.228494       | 0.0035         | 38.833               | R               | D                |                                    |                                     |                                 |                                             |                          |                                                               |
| 4              | APVTTGPLDMPIMHSDRYDFVK  | Oxidation@M:13                                       | AT5G66880.1                                                                                                                                                 | 56                   | 874.4177     | 3      | 2620.23127        | 0.0009         | 42.857               | R               | D                |                                    |                                     |                                 |                                             |                          |                                                               |
| 5              | DIGSGNFGVAR             |                                                      | AT3G50500.1,AT5G66880.1,AT4G33950.1                                                                                                                         | 76                   | 546.7757     | 2      | 1091.536847       | 0.0009         | 32.027               | K               | L                |                                    |                                     |                                 |                                             |                          |                                                               |
| 6              | ELVAVK                  |                                                      | AT3G50500.1,AT5G66880.1                                                                                                                                     | 24                   | 329.7094     | 2      | 657.404247        | -0.0018        | 21.424               | K               | Y                |                                    |                                     |                                 |                                             |                          |                                                               |
| 7              | EVILTPHLAIVMEYASGGELFER |                                                      | AT4G33950.1,AT4G33950.2,AT5G63650.1                                                                                                                         | 23                   | 892.4639     | 3      | 2674.36987        | 0.0023         | 93.738               | K               | I                |                                    |                                     |                                 |                                             |                          |                                                               |
| 8              | FFFQQLISGVSYCHAMQVCHR   | Oxidation@M:16,Carbamidation@C:13,Carbamidation@C:19 | AT4G33950.1,AT4G33950.2                                                                                                                                     | 80                   | 658.557      | 4      | 2630.198894       | 0.0007         | 50.878               | R               | D                |                                    |                                     |                                 |                                             |                          |                                                               |
| 9              | FFFQQLISGVSYCHAMQVCHR   | Carbamidation@C:13,Carbamidation@C:19                | AT4G33950.1,AT4G33950.2                                                                                                                                     | 77                   | 872.4076     | 3      | 2614.20097        | -0.0021        | 54.712               | R               | D                |                                    |                                     |                                 |                                             |                          |                                                               |
| 10             | FFFQQLISGVSYCHSMQICHR   | Oxidation@M:16,Carbamidation@C:13,Carbamidation@C:19 | AT5G66880.1                                                                                                                                                 | 64                   | 887.7439     | 3      | 2660.20987        | 0.0011         | 53.497               | R               | D                |                                    |                                     |                                 |                                             |                          |                                                               |
| 11             | FFFQQLISGVSYCHSMQICHR   | Carbamidation@C:13,Carbamidation@C:19                | AT5G66880.1                                                                                                                                                 | 63                   | 882.4119     | 3      | 2644.21387        | 0              | 55.674               | R               | D                |                                    |                                     |                                 |                                             |                          |                                                               |
| 12             | FSEDEAR                 |                                                      | AT3G50500.1,AT1G10940.1,AT1G78290.2,AT1G78290.3,AT5G66880.1,AT4G33950.1,AT4G33950.2,AT1G60940.1,AT1G60940.2                                                 | 51                   | 427.1881     | 2      | 852.361647        | 0.0004         | 19.064               | R               | F                |                                    |                                     |                                 |                                             |                          |                                                               |
| 13             | GDKIDENVQR              |                                                      | AT5G66880.1                                                                                                                                                 | 46                   | 587.2964     | 2      | 1172.578247       | -0.0003        | 18.879               | R               | E                |                                    |                                     |                                 |                                             |                          |                                                               |
| 14             | ICDFGYSK                | Carbamidation@C:2                                    | AT3G50500.1,AT1G10940.1,AT5G08590.1,AT1G78290.2,AT1G78290.3,AT5G66880.1,AT4G33950.1,AT4G33950.2,AT1G60940.1,AT1G60940.2,AT2G23030.1,AT4G40010.1,AT5G63650.1 | 36                   | 495.2235     | 2      | 988.432447        | 1E-04          | 28.114               | K               | S                |                                    |                                     |                                 |                                             |                          |                                                               |
| 15             | IFVADPAK                |                                                      | AT4G33950.1,AT4G33950.2                                                                                                                                     | 25                   | 430.7481     | 2      | 859.481647        | 0.0014         | 25.865               | R               | R                |                                    |                                     |                                 |                                             |                          |                                                               |
| 16             | IFVADPATR               |                                                      | AT3G50500.1,AT5G66880.1                                                                                                                                     | 46                   | 495.2741     | 2      | 988.533647        | -0.0005        | 28.058               | R               | I                |                                    |                                     |                                 |                                             |                          |                                                               |
| 17             | ILNVQYAIPTYVHISPECR     | Carbamidation@C:18                                   | AT4G33950.1,AT4G33950.2                                                                                                                                     | 99                   | 1144.0799    | 2      | 2286.145247       | -0.0015        | 50.604               | R               | H                |                                    |                                     |                                 |                                             |                          |                                                               |
| 18             | ISIPK                   |                                                      | AT5G66880.1                                                                                                                                                 | 40                   | 400.2501     | 2      | 798.485647        | 0.0005         | 35.393               | R               | T                |                                    |                                     |                                 |                                             |                          |                                                               |
| 19             | LENTLLDGSPAPR           |                                                      | AT3G50500.1,AT1G10940.1,AT5G66880.1,AT4G33950.1,AT4G33950.2,AT1G60940.1,AT1G60940.2,AT2G23030.1                                                             | 95                   | 691.8672     | 2      | 1381.719847       | -0.0002        | 34.295               | K               | L                |                                    |                                     |                                 |                                             |                          |                                                               |
| 20             | NHEWFLK                 |                                                      | AT4G33950.1,AT4G33950.2                                                                                                                                     | 48                   | 487.2479     | 2      | 972.481247        | -0.0005        | 31.362               | R               | N                |                                    |                                     |                                 |                                             |                          |                                                               |
| 21             | QSNELVAVK               |                                                      | AT4G33950.1                                                                                                                                                 | 39                   | 494.2769     | 2      | 986.539247        | -0.0003        | 22.521               | K               | Y                |                                    |                                     |                                 |                                             |                          |                                                               |
| 22             | REIINHR                 |                                                      | AT4G33950.1,AT4G33950.2                                                                                                                                     | 37                   | 469.27       | 2      | 936.525447        | 0.0002         | 16.104               | K               | S                |                                    |                                     |                                 |                                             |                          |                                                               |
| 23             | RISIPK                  |                                                      | AT4G33950.1,AT4G33950.2                                                                                                                                     | 50                   | 492.3034     | 2      | 982.592247        | -1E-04         | 30.992               | K               | N                |                                    |                                     |                                 |                                             |                          |                                                               |

|    |                            |                                          |                                                             |    |          |   |             |         |        |   |   |   |           |            |             |                                                                                      |                                              |  |
|----|----------------------------|------------------------------------------|-------------------------------------------------------------|----|----------|---|-------------|---------|--------|---|---|---|-----------|------------|-------------|--------------------------------------------------------------------------------------|----------------------------------------------|--|
| 24 | RISVPEIRNHEWFLK            |                                          | AT4G33950.1,AT4G33950.2                                     | 36 | 485.273  | 4 | 1937.062894 | -0.0008 | 42.732 | K | N |   |           |            |             |                                                                                      |                                              |  |
| 25 | SLRHPNIVR                  |                                          | AT3G50500.1,AT5G66880.1,AT4G33950.1,AT4G33950.2             | 26 | 364.5527 | 3 | 1090.63627  | 0.0003  | 19.603 | R | F |   |           |            |             |                                                                                      |                                              |  |
| 26 | SSVLHSQPK                  |                                          | AT3G50500.1,AT5G66880.1,AT4G33950.1,AT4G33950.2,AT4G40010.1 | 55 | 491.7695 | 2 | 981.524447  | 0.0002  | 16.684 | K | S |   |           |            |             |                                                                                      |                                              |  |
| 27 | SSVLHSQPK                  | Phosphorylation@S:6                      | AT3G50500.1,AT5G66880.1,AT4G33950.1,AT4G33950.2,AT4G40010.1 | 48 | 531.7525 | 2 | 1061.490447 | -0.0003 | 18.018 | K | S | + |           | @S:6       |             | AT3G50500.1;S173,AT5G66880.1;S172,AT4G33950.1;S171,AT4G33950.2;S123,AT4G40010.1;S154 | not passed (< 0.75 for @S:6)                 |  |
| 28 | SSVLHSQPKSTVGTPAYIAPEVLLK  | Phosphorylation@S:6,Phosphorylation@S:10 | AT4G33950.1,AT4G33950.2                                     | 30 | 928.1314 | 3 | 2781.37237  | -0.0031 | 48.028 | K | K | + |           | @S:6,@S:10 |             | AT4G33950.1;S171,AT4G33950.1;S175,AT4G33950.2;S123,AT4G33950.2;S127                  | not passed (< 0.75 for @S:6 and @S:10)       |  |
| 29 | SSVLHSQPKSTVGTPAYIAPEVLLKK | Phosphorylation@S:1,Phosphorylation@S:10 | AT4G33950.1,AT4G33950.2                                     | 65 | 970.8304 | 3 | 2909.46937  | -0.001  | 43.913 | K | E | + |           | @S:1,@S:10 |             | AT4G33950.1;S166,AT4G33950.1;S175,AT4G33950.2;S118,AT4G33950.2;S127                  | not passed (< 0.75 for @S:1 and @S:10)       |  |
| 30 | SSVLHSQPKSTVGTPAYIAPEVLLKK | Phosphorylation@S:2,Phosphorylation@S:6  | AT4G33950.1,AT4G33950.2                                     | 28 | 728.375  | 4 | 2909.470894 | 0.0004  | 43.455 | K | E | + | ambiguous | @S:6       | @S:1orS:2   | AT4G33950.1;S171,AT4G33950.1;S166orS167,AT4G33950.2;S123,AT4G33950.2;S118orS119      | not passed (< 0.75 for @S:6 , @S:1 and S:2)  |  |
| 31 | SSVLHSQPKSTVGTPAYIAPEVLLKK | Phosphorylation@S:6,Phosphorylation@S:10 | AT4G33950.1,AT4G33950.2                                     | 39 | 970.8303 | 3 | 2909.46907  | -0.0014 | 43.741 | K | E | + |           | @S:6,@S:10 |             | AT4G33950.1;S171,AT4G33950.1;S175,AT4G33950.2;S123,AT4G33950.2;S127                  | not passed (< 0.75 for @S:6 and @S:10)       |  |
| 32 | SSVLHSQPKSTVGTPAYIAPEVLLR  | Phosphorylation@S:2,Phosphorylation@S:10 | AT5G66880.1                                                 | 43 | 937.4681 | 3 | 2809.38247  | 0.0009  | 49.419 | K | Q | + | ambiguous | @S:10      | @S:1orS:2   | AT5G66880.1;S176,AT5G66880.1;S167orS168                                              | not passed (< 0.75 for @S:10, @S:1 and S:2)  |  |
| 33 | SSVLHSQPKSTVGTPAYIAPEVLLR  | Phosphorylation@S:6,Phosphorylation@T:11 | AT5G66880.1                                                 | 30 | 937.4685 | 3 | 2809.38367  | 0.0021  | 49.96  | K | Q | + | ambiguous | @S:6       | @S:10orT:11 | AT5G66880.1;S172,AT5G66880.1;S176orT177                                              | not passed (< 0.75 for @S:6, @S:10 and T:11) |  |
| 34 | STVGTPAYIAPEVLLK           |                                          | AT4G33950.1,AT4G33950.2                                     | 20 | 829.9714 | 2 | 1657.928247 | -0.0009 | 46.679 | K | K |   |           |            |             |                                                                                      |                                              |  |
| 35 | STVGTPAYIAPEVLLKK          |                                          | AT4G33950.1,AT4G33950.2                                     | 56 | 894.0183 | 2 | 1786.022047 | -0.0019 | 41.815 | K | E |   |           |            |             |                                                                                      |                                              |  |
| 36 | STVGTPAYIAPEVLLR           |                                          | AT5G66880.1                                                 | 71 | 843.9761 | 2 | 1685.937647 | 0.0025  | 47.597 | K | Q |   |           |            |             |                                                                                      |                                              |  |
| 37 | STVGTPAYIAPEVLLR           | Phosphorylation@T:2                      | AT5G66880.1                                                 | 42 | 883.9588 | 2 | 1765.903047 | 0.0016  | 55.563 | K | Q | + | ambiguous |            | @S:1orT:2   | AT5G66880.1;S176orT177                                                               | not passed (<0.75 for @S:1 and @T:2)         |  |
| 38 | STVGTPAYIAPEVLLRQEYDQK     |                                          | AT5G66880.1                                                 | 61 | 1204.128 | 2 | 2406.241447 | -0.0017 | 48.044 | K | I |   |           |            |             |                                                                                      |                                              |  |
| 39 | THSWFLK                    |                                          | AT5G66880.1                                                 | 35 | 459.7451 | 2 | 917.475647  | -0.0003 | 30.332 | K | N |   |           |            |             |                                                                                      |                                              |  |
| 40 | TIHRILNVQYAIPTYVHISPECR    | Carbamidation@C:22                       | AT4G33950.1,AT4G33950.2                                     | 55 | 699.3672 | 4 | 2793.439694 | 0.0013  | 45.528 | K | H |   |           |            |             |                                                                                      |                                              |  |
| 41 | YDFVK                      |                                          | AT3G50500.1,AT5G66880.1,AT5G61450.1                         | 26 | 336.1738 | 2 | 670.333047  | 0.0004  | 25.866 | R | D |   |           |            |             |                                                                                      |                                              |  |
| 42 | YELVK                      |                                          | AT1G10940.1,AT4G33950.1,AT1G60940.1,AT1G60940.2             | 30 | 326.1895 | 2 | 650.364447  | 0.0005  | 22.448 | R | D |   |           |            |             |                                                                                      |                                              |  |
| 43 | YIERGDKIDENVQR             |                                          | AT5G66880.1                                                 | 34 | 578.9637 | 3 | 1733.86927  | -0.0005 | 21.807 | K | E |   |           |            |             |                                                                                      |                                              |  |
| 44 | YSIPDDIR                   |                                          | AT5G66880.1                                                 | 50 | 489.7479 | 2 | 977.481247  | -0.0005 | 34.366 | K | I |   |           |            |             |                                                                                      |                                              |  |
